# Supplementary material for: Precocious Metamorphosis of Silkworm Larvae Infected by BmNPV in the Latter Half of the Fifth Instar
Source: Front Physiol. 2021 May 10;12:650972. doi: 10.3389/fphys.2021.650972 (PMC8141865; doi:10.3389/fphys.2021.650972)
Supplement: Supplementary Table 2 — The weight of mature silkworms and pupae in BmNPV-infected and control groups. [file Table_2.xlsx]

## Sheet: Sheet1
The weight of mature silkworms and pupae in BmNPV-infected and control groups.
1. Each value is the total weight of 30 randomly selected individuals.
2. The unit of weight is grams.
	The weight of mature silkworms	The weight of female pupae	The weight of male pupae
BmNPV-infected	55.68	26.61	25.51
Control	70.34	35.46	28.32
