# Supplementary material for: Precocious Metamorphosis of Silkworm Larvae Infected by BmNPV in the Latter Half of the Fifth Instar
Source: Front Physiol. 2021 May 10;12:650972. doi: 10.3389/fphys.2021.650972 (PMC8141865; doi:10.3389/fphys.2021.650972)
Supplement: Supplementary Table 3 — The results of feeding experiment with cholesterol, and 7-dehydrocholesterol (7dC), using water as control. [file Table_3.xlsx]

## Sheet: Sheet1
The results of feeding experiment with cholesterol, and 7-dehydrocholesterol (7dC) , using water as control.
Treatment	Concentration (mg/L)	Number of each group larvae fed	Number of the majority of larvae started maturing	Time-point of the majority of larvae started maturing	Number of anal prolapse
Cholesterol	8000	200	122	Day 7 the fifth instar larvae, 3:00 p.m.	40
		200	118		42
		200	103		46
7dC	8000	200	106	Day 7 the fifth instar larvae, 3:00 p.m.	67
		200	98		71
		200	92		62
Water	the same-volume	200	167	Day 8 the fifth instar larvae, 7:00 a.m.	0
		200	155		0
		200	153		0
