# Supplementary material for: Precocious Metamorphosis of Silkworm Larvae Infected by BmNPV in the Latter Half of the Fifth Instar
Source: Front Physiol. 2021 May 10;12:650972. doi: 10.3389/fphys.2021.650972 (PMC8141865; doi:10.3389/fphys.2021.650972)
Supplement: Supplementary Table 4 — Summary statistics of prothoracic gland of Bombyx mori genes based on transcriptome data. [file Table_4.xlsx]

## Sheet: Sheet1
Summary statistics of prothoracic gland of Bombyx mori genes based on transcriptome data.
Sample	Raw Data (bp)	Clean Data (bp)	Clean bases	Error rate(%)	Q20 (%)	Q30 (%)	GC Content (%)
C1-PGs	59186016	57194240	8.58G	0.02	95.35	89.3	46.71
C2-PGs	59397946	57810790	8.67G	0.02	95.74	90.07	48.05
N1-PGs	52801092	51259854	7.69G	0.02	95.73	90.01	45.64
N2-PGs	62868024	61288966	9.19G	0.02	96.64	91.69	47.26
